# Supplementary material for: Elucidating the Causal Relationships between Cerebrospinal Fluid Metabolites and Glioblastoma Multiforme Insights from Mendelian Randomization Study
Source: Research Square preprint supplement (doi:10.21203/rs.3.rs-7534643/v1), 2025-11-24
Supplement: Supplementary file 1 [file 3594aaccf9a8e96533f3effa.xlsx]

## Sheet: Sheet1
Table 1. Results of Bayesian MR Analysis with GBM as Exposure and Various CSF Metabolites as Outcomes.
exposure	id.outcome	outcome	method	beta	lci95	uci95	or	or_lci95	or_uci95	pval
Brain glioblastoma	ebi-a-GCST90026086	3-methoxytyramine sulfate levels	BWMR	0.0414756	0.0119407	0.0710105	1.04235	1.01201	1.07359	0.00591576
Brain glioblastoma	ebi-a-GCST90026134	Caffeine levels	BWMR	0.120227	0.0165307	0.223923	1.12775	1.01667	1.25098	0.0230592
Brain glioblastoma	ebi-a-GCST90026151	Dimethyl sulfone levels	BWMR	0.104395	0.0262473	0.182543	1.11004	1.02659	1.20027	0.00883695
Brain glioblastoma	ebi-a-GCST90026159	Fructose levels	BWMR	-0.0144439	-0.0299271	0.00103933	0.98566	0.970516	0.99104	0.0474846
Brain glioblastoma	ebi-a-GCST90026247	Phenol sulfate levels	BWMR	0.0639156	0.0100106	0.117821	1.066	1.01006	1.12504	0.0201262
*BWMR: Bayesian Weighted Mendelian Randomization, lci95: The lower bound of the 95% confidence interval for the beta coefficient, uci95: The upper bound of the 95% confidence interval for the beta coefficient, or: Odds Ratio, or_lci95: The lower bound of the 95% confidence interval for the odds ratio, or_uci95: The upper bound of the 95% confidence interval for the odds ratio, pval: P-value,
