# Supplementary material for: Elucidating the Causal Relationships between Cerebrospinal Fluid Metabolites and Glioblastoma Multiforme Insights from Mendelian Randomization Study
Source: Research Square preprint supplement (doi:10.21203/rs.3.rs-7534643/v1), 2025-11-24
Supplement: Supplementary file 2 [file c3ae40880ee257923f14bb1b.xlsx]

## Sheet: Sheet1
Supplementary Table 1. CSF Metabolite information.
GWAS ID	Year	Trait	Sample size	Number of SNPs	superpathway
ebi-a-GCST90026065	2021	2'-deoxyuridine levels	291	6871436	Nucleotide
ebi-a-GCST90026066	2021	2'-o-methylcytidine levels	291	6863029	Nucleotide
ebi-a-GCST90026094	2021	3-ureidopropionate levels	291	6869663	Nucleotide
ebi-a-GCST90026098	2021	5,6-dihydrothymine levels	291	6858355	Nucleotide
ebi-a-GCST90026099	2021	5,6-dihydrouridine levels	291	6854836	Nucleotide
ebi-a-GCST90026103	2021	5-methylcytidine levels	291	6857013	Nucleotide
ebi-a-GCST90026105	2021	5-methyluridine (ribothymidine) levels	291	6862642	Nucleotide
ebi-a-GCST90026108	2021	7-methylguanine levels	291	6849840	Nucleotide
ebi-a-GCST90026112	2021	Adenine levels	291	6857290	Nucleotide
ebi-a-GCST90026113	2021	Adenosine 3',5'-cyclic monophosphate (camp) levels	291	6871556	Nucleotide
ebi-a-GCST90026026	2021	Allantoin levels	291	6866138	Nucleotide
ebi-a-GCST90026129	2021	Beta-alanine levels	291	6858893	Nucleotide
ebi-a-GCST90026206	2021	N-acetyl-beta-alanine levels	291	6861205	Nucleotide
ebi-a-GCST90026148	2021	Cytidine levels	291	6852082	Nucleotide
ebi-a-GCST90026176	2021	Guanosine levels	291	6858599	Nucleotide
ebi-a-GCST90026031	2021	Hypoxanthine levels	291	6868361	Nucleotide
ebi-a-GCST90026033	2021	Inosine levels	291	6855588	Nucleotide
ebi-a-GCST90026233	2021	N1-methylinosine levels	291	6863004	Nucleotide
ebi-a-GCST90026232	2021	N1-methyladenosine levels	291	6863708	Nucleotide
ebi-a-GCST90026234	2021	N2,n2-dimethylguanosine levels	291	6859667	Nucleotide
ebi-a-GCST90026236	2021	N6-carbamoylthreonyladenosine levels	291	6867324	Nucleotide
ebi-a-GCST90026237	2021	N6-succinyladenosine levels	291	6864823	Nucleotide
ebi-a-GCST90026241	2021	Orotate levels	291	6866013	Nucleotide
ebi-a-GCST90026242	2021	Orotidine levels	291	6864737	Nucleotide
ebi-a-GCST90026253	2021	Pseudouridine levels	291	6857467	Nucleotide
ebi-a-GCST90026253	2021	Pseudouridine levels	291	6857467	Nucleotide
ebi-a-GCST90026001	2021	Urate levels	291	6864628	Nucleotide
ebi-a-GCST90026036	2021	Uridine levels	291	6863016	Nucleotide
ebi-a-GCST90026037	2021	Xanthine levels	291	6858097	Nucleotide
ebi-a-GCST90026326	2021	3-(3-amino-3-carboxypropyl)uridine levels	291	6862868	Nucleotide
ebi-a-GCST90026027	2021	Alpha-ketoglutarate levels	291	6862506	energy
ebi-a-GCST90026141	2021	Citrate levels	291	6854523	energy
ebi-a-GCST90026188	2021	Isocitrate levels	291	6867357	energy
ebi-a-GCST90026034	2021	Malate levels	291	6841851	energy
ebi-a-GCST90026038	2021	Phosphate levels	291	6815797	energy
ebi-a-GCST90026269	2021	Succinylcarnitine (c4-dc) levels	291	6863155	energy
ebi-a-GCST90026043	2021	1,2-dipalmitoyl-gpc (16:0/16:0) levels	291	6863743	Lipid
ebi-a-GCST90026044	2021	1-(1-enyl-palmitoyl)-2-arachidonoyl-gpc (p-16:0/20:4) levels	291	6872770	Lipid
ebi-a-GCST90026045	2021	1-(1-enyl-palmitoyl)-2-oleoyl-gpc (p-16:0/18:1) levels	291	6866199	Lipid
ebi-a-GCST90026046	2021	1-arachidonoyl-gpc (20:4n6) levels	291	6869885	Lipid
ebi-a-GCST90026047	2021	1-linoleoyl-gpc (18:2) levels	291	6871475	Lipid
ebi-a-GCST90026050	2021	1-myristoyl-2-palmitoyl-gpc (14:0/16:0) levels	291	6864333	Lipid
ebi-a-GCST90026051	2021	1-oleoyl-GPC (18:1) levels	291	6865450	Lipid
ebi-a-GCST90026052	2021	1-palmitoyl-2-arachidonoyl-gpc (16:0/20:4n6) levels	291	6866687	Lipid
ebi-a-GCST90026053	2021	1-palmitoyl-2-docosahexaenoyl-gpc (16:0/22:6) levels	291	6866815	Lipid
ebi-a-GCST90026054	2021	1-palmitoyl-2-linoleoyl-gpc (16:0/18:2) levels	291	6867823	Lipid
ebi-a-GCST90026055	2021	1-palmitoyl-2-oleoyl-gpc (16:0/18:1) levels	291	6862444	Lipid
ebi-a-GCST90026055	2021	1-palmitoyl-2-oleoyl-gpc (16:0/18:1) levels	291	6862444	Lipid
ebi-a-GCST90026057	2021	1-palmitoyl-2-stearoyl-gpc (16:0/18:0) levels	291	6868135	Lipid
ebi-a-GCST90026060	2021	1-stearoyl-2-arachidonoyl-gpc (18:0/20:4) levels	291	6865851	Lipid
ebi-a-GCST90026061	2021	1-stearoyl-2-docosahexaenoyl-gpc (18:0/22:6) levels	291	6867987	Lipid
ebi-a-GCST90026062	2021	1-stearoyl-2-linoleoyl-gpc (18:0/18:2) levels	291	6866691	Lipid
ebi-a-GCST90026063	2021	1-stearoyl-2-oleoyl-gpc (18:0/18:1) levels	291	6863538	Lipid
ebi-a-GCST90026064	2021	1-stearoyl-gpc (18:0) levels	291	6867723	Lipid
ebi-a-GCST90026072	2021	2-hydroxyadipate levels	291	6872153	Lipid
ebi-a-GCST90026074	2021	2-hydroxyglutarate levels	291	6876014	Lipid
ebi-a-GCST90026078	2021	3-carboxy-4-methyl-5-propyl-2-furanpropanoate (cmpf) levels	291	6877035	Lipid
ebi-a-GCST90026080	2021	3-hydroxy-3-methylglutarate levels	291	6859796	Lipid
ebi-a-GCST90026081	2021	3-hydroxybutyrate (bhba) levels	291	6871750	Lipid
ebi-a-GCST90026082	2021	3-hydroxyhexanoate levels	291	6857435	Lipid
ebi-a-GCST90026083	2021	3-hydroxyoctanoate levels	291	6874040	Lipid
ebi-a-GCST90026101	2021	5-hydroxyhexanoate levels	291	6874503	Lipid
ebi-a-GCST90026107	2021	7-alpha-hydroxy-3-oxo-4-cholestenoate (7-hoca) levels	291	6865966	Lipid
ebi-a-GCST90026017	2021	Acetoacetate levels	291	6874407	Lipid
ebi-a-GCST90026110	2021	Acetylcarnitine (c2) levels	291	6866949	Lipid
ebi-a-GCST90026122	2021	Arachidonate (20:4n6) levels	291	6874970	Lipid
ebi-a-GCST90026127	2021	Behenoyl sphingomyelin (d18:1/22:0) levels	291	6874679	Lipid
ebi-a-GCST90026136	2021	Carnitine levels	291	6862654	Lipid
ebi-a-GCST90026003	2021	Cholesterol levels	291	6862400	Lipid
ebi-a-GCST90026138	2021	Choline levels	291	6853448	Lipid
ebi-a-GCST90026139	2021	Choline phosphate levels	291	6871723	Lipid
ebi-a-GCST90026007	2021	Cortisol levels	291	6866828	Lipid
ebi-a-GCST90026142	2021	Cortisone levels	291	6873904	Lipid
ebi-a-GCST90026149	2021	Deoxycarnitine levels	291	6868597	Lipid
ebi-a-GCST90026153	2021	Dimethylmalonic acid levels	291	6872832	Lipid
ebi-a-GCST90026161	2021	Galactosylglycerol levels	291	6864129	Lipid
ebi-a-GCST90026173	2021	Glycerol levels	291	6861453	Lipid
ebi-a-GCST90026030	2021	Glycerol 3-phosphate levels	291	6876618	Lipid
ebi-a-GCST90026174	2021	Glycerophosphoinositol levels	291	6865006	Lipid
ebi-a-GCST90026193	2021	Maleate levels	291	6874699	Lipid
ebi-a-GCST90026200	2021	Methylmalonate (mma) levels	291	6869734	Lipid
ebi-a-GCST90026203	2021	Myo-inositol levels	291	6868623	Lipid
ebi-a-GCST90026240	2021	Octanoylcarnitine (c8) levels	291	6874963	Lipid
ebi-a-GCST90026244	2021	Palmitoyl dihydrosphingomyelin (d18:0/16:0) levels	291	6873597	Lipid
ebi-a-GCST90026245	2021	Palmitoyl sphingomyelin (d18:1/16:0) levels	291	6863313	Lipid
ebi-a-GCST90026252	2021	Propionylcarnitine (c3) levels	291	6866678	Lipid
ebi-a-GCST90026018	2021	Sphingomyelin (d18:1/14:0, d16:1/16:0) levels	291	6870742	Lipid
ebi-a-GCST90026019	2021	Sphingomyelin (d18:1/18:1, d18:2/18:0) levels	291	6864112	Lipid
ebi-a-GCST90026020	2021	Sphingomyelin (d18:1/20:0, d16:1/22:0) levels	291	6870214	Lipid
ebi-a-GCST90026021	2021	Sphingomyelin (d18:1/20:1, d18:2/20:0) levels	291	6873371	Lipid
ebi-a-GCST90026022	2021	Sphingomyelin (d18:1/22:1, d18:2/22:0, d16:1/24:1) levels	291	6872203	Lipid
ebi-a-GCST90026023	2021	Sphingomyelin (d18:1/24:1, d18:2/24:0) levels	291	6867236	Lipid
ebi-a-GCST90026024	2021	Sphingomyelin (d18:2/16:0, d18:1/16:1) levels	291	6869841	Lipid
ebi-a-GCST90026025	2021	Sphingomyelin (d18:2/24:1, d18:1/24:2) levels	291	6867977	Lipid
ebi-a-GCST90026267	2021	Stearoyl sphingomyelin (d18:1/18:0) levels	291	6863801	Lipid
ebi-a-GCST90026279	2021	Trimethylamine n-oxide levels	291	6871020	Lipid
ebi-a-GCST90026310	2021	Butyrate (4:0) levels	291	6865381	Lipid
ebi-a-GCST90026042	2021	(N(1) + N(8))-acetylspermidine levels	291	6871844	Lipid
ebi-a-GCST90026048	2021	1-methylhistidine levels	291	6869990	Lipid
ebi-a-GCST90026059	2021	1-ribosyl-imidazoleacetate levels	291	6868843	Lipid
ebi-a-GCST90026067	2021	2,3-dihydroxy-2-methylbutyrate levels	291	6869300	Lipid
ebi-a-GCST90026069	2021	2-aminobutyrate levels	291	6860657	Lipid
ebi-a-GCST90026071	2021	2-hydroxy-3-methylvalerate levels	291	6862786	Lipid
ebi-a-GCST90026042	2021	(N(1) + N(8))-acetylspermidine levels	291	6871844	Amino Acid
ebi-a-GCST90026048	2021	1-methylhistidine levels	291	6869990	Amino Acid
ebi-a-GCST90026059	2021	1-ribosyl-imidazoleacetate levels	291	6868843	Amino Acid
ebi-a-GCST90026067	2021	2,3-dihydroxy-2-methylbutyrate levels	291	6869300	Amino Acid
ebi-a-GCST90026069	2021	2-aminobutyrate levels	291	6860657	Amino Acid
ebi-a-GCST90026071	2021	2-hydroxy-3-methylvalerate levels	291	6862786	Amino Acid
ebi-a-GCST90026073	2021	2-hydroxybutyrate/2-hydroxyisobutyrate levels	291	6865326	Amino Acid
ebi-a-GCST90026075	2021	2-oxoadipate levels	291	6874643	Amino Acid
ebi-a-GCST90026077	2021	3-(4-hydroxyphenyl)lactate levels	291	6866564	Amino Acid
ebi-a-GCST90026079	2021	3-hydroxy-2-ethylpropionate levels	291	6864665	Amino Acid
ebi-a-GCST90026039	2021	3-hydroxyisobutyrate levels	291	6856656	Amino Acid
ebi-a-GCST90026032	2021	3-indoxyl sulfate levels	291	6874000	Amino Acid
ebi-a-GCST90026086	2021	3-methoxytyramine sulfate levels	291	6868777	Amino Acid
ebi-a-GCST90026087	2021	3-methoxytyrosine levels	291	6873655	Amino Acid
ebi-a-GCST90026088	2021	3-methyl-2-oxobutyrate levels	291	6852916	Amino Acid
ebi-a-GCST90026089	2021	3-methyl-2-oxovalerate levels	291	6858618	Amino Acid
ebi-a-GCST90026090	2021	3-methylglutaconate levels	291	6857242	Amino Acid
ebi-a-GCST90026091	2021	3-methylglutarylcarnitine (2) levels	291	6869363	Amino Acid
ebi-a-GCST90026092	2021	3-methylhistidine levels	291	6875825	Amino Acid
ebi-a-GCST90026095	2021	4-acetamidobutanoate levels	291	6861646	Amino Acid
ebi-a-GCST90026096	2021	4-methyl-2-oxopentanoate levels	291	6857254	Amino Acid
ebi-a-GCST90026230	2021	N-trimethyl 5-aminovalerate levels	291	6867597	Amino Acid
ebi-a-GCST90026102	2021	5-hydroxyindoleacetate levels	291	6873691	Amino Acid
ebi-a-GCST90026104	2021	5-methylthioadenosine (mta) levels	291	6859532	Amino Acid
ebi-a-GCST90026040	2021	5-oxoproline levels	291	6851273	Amino Acid
ebi-a-GCST90026106	2021	6-oxopiperidine-2-carboxylate levels	291	6867203	Amino Acid
ebi-a-GCST90026111	2021	Acisoga levels	291	6873613	Amino Acid
ebi-a-GCST90026114	2021	Alanine levels	291	6857767	Amino Acid
ebi-a-GCST90026115	2021	Alpha-hydroxyisocaproate levels	291	6861555	Amino Acid
ebi-a-GCST90026116	2021	Alpha-hydroxyisovalerate levels	291	6866127	Amino Acid
ebi-a-GCST90026117	2021	Alpha-ketoglutaramate levels	291	6859612	Amino Acid
ebi-a-GCST90026123	2021	Argininate levels	291	6872122	Amino Acid
ebi-a-GCST90026124	2021	Arginine levels	291	6854925	Amino Acid
ebi-a-GCST90026125	2021	Argininosuccinate levels	291	6874351	Amino Acid
ebi-a-GCST90026012	2021	Asparagine levels	291	6852861	Amino Acid
ebi-a-GCST90026130	2021	Beta-citrylglutamate levels	291	6865028	Amino Acid
ebi-a-GCST90026131	2021	Beta-hydroxyisovalerate levels	291	6862027	Amino Acid
ebi-a-GCST90026132	2021	Betaine levels	291	6860007	Amino Acid
ebi-a-GCST90026133	2021	C-glycosyltryptophan levels	291	6863814	Amino Acid
ebi-a-GCST90026135	2021	Carboxyethyl-gaba levels	291	6861179	Amino Acid
ebi-a-GCST90026140	2021	Citramalate levels	291	6874582	Amino Acid
ebi-a-GCST90026016	2021	Citrulline levels	291	6861704	Amino Acid
ebi-a-GCST90026143	2021	Creatine levels	291	6847545	Amino Acid
ebi-a-GCST90026000	2021	Creatinine levels	291	6842254	Amino Acid
ebi-a-GCST90026144	2021	Cys-gly, oxidized levels	291	6869649	Amino Acid
ebi-a-GCST90026013	2021	Glycine levels	291	6863102	Amino Acid
ebi-a-GCST90026179	2021	Histidine levels	291	6854570	Amino Acid
ebi-a-GCST90026180	2021	Homoarginine levels	291	6868686	Amino Acid
ebi-a-GCST90026181	2021	Homocarnosine levels	291	6872562	Amino Acid
ebi-a-GCST90026183	2021	Homovanillate (hva) levels	291	6867088	Amino Acid
ebi-a-GCST90026185	2021	Hydroxyasparagine levels	291	6870582	Amino Acid
ebi-a-GCST90026186	2021	Indoleacetate levels	291	6873460	Amino Acid
ebi-a-GCST90026187	2021	Isobutyrylcarnitine (c4) levels	291	6865161	Amino Acid
ebi-a-GCST90026189	2021	Isoleucine levels	291	6859714	Amino Acid
ebi-a-GCST90026190	2021	Isovalerate (i5:0) levels	291	6873693	Amino Acid
ebi-a-GCST90026191	2021	Kynurenate levels	291	6874698	Amino Acid
ebi-a-GCST90026011	2021	Kynurenine levels	291	6864325	Amino Acid
ebi-a-GCST90026192	2021	Leucine levels	291	6856440	Amino Acid
ebi-a-GCST90026004	2021	Lysine levels	291	6855353	Amino Acid
ebi-a-GCST90026196	2021	Methionine levels	291	6852153	Amino Acid
ebi-a-GCST90026197	2021	Methionine sulfone levels	291	6869690	Amino Acid
ebi-a-GCST90026198	2021	Methionine sulfoxide levels	291	6866220	Amino Acid
ebi-a-GCST90026201	2021	Methylsuccinate levels	291	6874831	Amino Acid
ebi-a-GCST90026202	2021	Methylsuccinoylcarnitine levels	291	6871821	Amino Acid
ebi-a-GCST90026204	2021	N-acetyl-3-methylhistidine levels	291	6874500	Amino Acid
ebi-a-GCST90026205	2021	N-acetyl-aspartyl-glutamate (naag) levels	291	6871662	Amino Acid
ebi-a-GCST90026207	2021	N-acetyl-isoputreanine levels	291	6858538	Amino Acid
ebi-a-GCST90026208	2021	N-acetylalanine levels	291	6853999	Amino Acid
ebi-a-GCST90026209	2021	N-acetylarginine levels	291	6858617	Amino Acid
ebi-a-GCST90026210	2021	N-acetylasparagine levels	291	6858679	Amino Acid
ebi-a-GCST90026211	2021	N-acetylaspartate (naa) levels	291	6864949	Amino Acid
ebi-a-GCST90026213	2021	N-acetylglutamate levels	291	6868080	Amino Acid
ebi-a-GCST90026214	2021	N-acetylglutamine levels	291	6857621	Amino Acid
ebi-a-GCST90026215	2021	N-acetylglycine levels	291	6866555	Amino Acid
ebi-a-GCST90026216	2021	N-acetylhistidine levels	291	6870423	Amino Acid
ebi-a-GCST90026217	2021	N-acetylisoleucine levels	291	6866003	Amino Acid
ebi-a-GCST90026218	2021	N-acetylleucine levels	291	6872721	Amino Acid
ebi-a-GCST90026219	2021	N-acetylmethionine levels	291	6869289	Amino Acid
ebi-a-GCST90026221	2021	N-acetylphenylalanine levels	291	6871436	Amino Acid
ebi-a-GCST90026222	2021	N-acetylputrescine levels	291	6858431	Amino Acid
ebi-a-GCST90026223	2021	N-acetylserine levels	291	6858781	Amino Acid
ebi-a-GCST90026224	2021	N-acetyltaurine levels	291	6864243	Amino Acid
ebi-a-GCST90026225	2021	N-acetylthreonine levels	291	6861761	Amino Acid
ebi-a-GCST90026226	2021	N-acetylvaline levels	291	6860855	Amino Acid
ebi-a-GCST90026227	2021	N-delta-acetylornithine levels	291	6875227	Amino Acid
ebi-a-GCST90026228	2021	N-formylanthranilic acid levels	291	6872756	Amino Acid
ebi-a-GCST90026229	2021	N-formylmethionine levels	291	6868313	Amino Acid
ebi-a-GCST90026230	2021	N-trimethyl 5-aminovalerate levels	291	6867597	Amino Acid
ebi-a-GCST90026235	2021	N6,n6,n6-trimethyllysine levels	291	6861556	Amino Acid
ebi-a-GCST90026015	2021	Ornithine levels	291	6857282	Amino Acid
ebi-a-GCST90026247	2021	Phenol sulfate levels	291	6873337	Amino Acid
ebi-a-GCST90026249	2021	Phenylalanine levels	291	6854585	Amino Acid
ebi-a-GCST90026250	2021	Phenyllactate (pla) levels	291	6870736	Amino Acid
ebi-a-GCST90026251	2021	Pipecolate levels	291	6872837	Amino Acid
ebi-a-GCST90026014	2021	Proline levels	291	6867736	Amino Acid
ebi-a-GCST90026006	2021	Pyroglutamine levels	291	6869165	Amino Acid
ebi-a-GCST90026261	2021	S-1-pyrroline-5-carboxylate levels	291	6866033	Amino Acid
ebi-a-GCST90026262	2021	S-methylcysteine levels	291	6875108	Amino Acid
ebi-a-GCST90026264	2021	Serine levels	291	6851361	Amino Acid
ebi-a-GCST90026265	2021	Spermidine levels	291	6874606	Amino Acid
ebi-a-GCST90026035	2021	Taurine levels	291	6856779	Amino Acid
ebi-a-GCST90026276	2021	Threonine levels	291	6857287	Amino Acid
ebi-a-GCST90026277	2021	Trans-4-hydroxyproline levels	291	6871131	Amino Acid
ebi-a-GCST90026280	2021	Tryptophan levels	291	6853216	Amino Acid
ebi-a-GCST90026281	2021	Tryptophan betaine levels	291	6875407	Amino Acid
ebi-a-GCST90026005	2021	Tyrosine levels	291	6857755	Amino Acid
ebi-a-GCST90026283	2021	Urea levels	291	6859891	Amino Acid
ebi-a-GCST90026284	2021	Valine levels	291	6860504	Amino Acid
ebi-a-GCST90026287	2021	2,3-dihydroxy-5-methylthio-4-pentenoate (dmtpa) levels	291	6859869	Amino Acid
ebi-a-GCST90026299	2021	1-carboxyethylvaline levels	291	6870931	Amino Acid
ebi-a-GCST90026302	2021	1-methyl-5-imidazoleacetate levels	291	6873240	Amino Acid
ebi-a-GCST90026304	2021	1-carboxyethylphenylalanine levels	291	6869635	Amino Acid
ebi-a-GCST90026306	2021	N,n,n-trimethyl-alanylproline betaine (tmap) levels	291	6870241	Amino Acid
ebi-a-GCST90026332	2021	3-amino-2-piperidone levels	291	6861667	Amino Acid
ebi-a-GCST90026336	2021	N6-methyllysine levels	291	6875675	Amino Acid
ebi-a-GCST90026010	2021	1,5-anhydroglucitol (1,5-ag) levels	291	6869514	Carbohydrate
ebi-a-GCST90026119	2021	Arabinose levels	291	6855281	Carbohydrate
ebi-a-GCST90026120	2021	Arabitol/xylitol levels	291	6861562	Carbohydrate
ebi-a-GCST90026121	2021	Arabonate/xylonate levels	291	6864956	Carbohydrate
ebi-a-GCST90026157	2021	Erythronate levels	291	6847232	Carbohydrate
ebi-a-GCST90026159	2021	Fructose levels	291	6859086	Carbohydrate
ebi-a-GCST90026160	2021	Galactonate levels	291	6876847	Carbohydrate
ebi-a-GCST90025999	2021	Glucose levels	291	6845160	Carbohydrate
ebi-a-GCST90026029	2021	Glucuronate levels	291	6869534	Carbohydrate
ebi-a-GCST90026172	2021	Glycerate levels	291	6844167	Carbohydrate
ebi-a-GCST90026008	2021	Lactate levels	291	6849729	Carbohydrate
ebi-a-GCST90026194	2021	Mannitol/sorbitol levels	291	6861101	Carbohydrate
ebi-a-GCST90026195	2021	Mannose levels	291	6857288	Carbohydrate
ebi-a-GCST90026212	2021	N-acetylglucosamine/n-acetylgalactosamine levels	291	6873300	Carbohydrate
ebi-a-GCST90026220	2021	N-acetylneuraminate levels	291	6864922	Carbohydrate
ebi-a-GCST90026256	2021	Pyruvate levels	291	6869689	Carbohydrate
ebi-a-GCST90026258	2021	Ribitol levels	291	6857360	Carbohydrate
ebi-a-GCST90026259	2021	Ribonate levels	291	6863813	Carbohydrate
ebi-a-GCST90026260	2021	Ribulonate/xylulonate levels	291	6868135	Carbohydrate
ebi-a-GCST90026049	2021	1-methylnicotinamide levels	291	6873481	Cofactors and Vitamins
ebi-a-GCST90026118	2021	Alpha-tocopherol levels	291	6866118	Cofactors and Vitamins
ebi-a-GCST90026126	2021	Ascorbate (vitamin c) levels	291	6870007	Cofactors and Vitamins
ebi-a-GCST90026002	2021	Bilirubin (z,z) levels	291	6871937	Cofactors and Vitamins
ebi-a-GCST90026177	2021	Gulonate levels	291	6864681	Cofactors and Vitamins
ebi-a-GCST90026231	2021	N1-methyl-2-pyridone-5-carboxamide levels	291	6872113	Cofactors and Vitamins
ebi-a-GCST90026238	2021	Nicotinamide riboside levels	291	6863103	Cofactors and Vitamins
ebi-a-GCST90026243	2021	Oxalate (ethanedioate) levels	291	6853005	Cofactors and Vitamins
ebi-a-GCST90026246	2021	Pantothenate levels	291	6871693	Cofactors and Vitamins
ebi-a-GCST90026254	2021	Pyridoxal levels	291	6874977	Cofactors and Vitamins
ebi-a-GCST90026255	2021	Pyridoxate levels	291	6873787	Cofactors and Vitamins
ebi-a-GCST90026275	2021	Threonate levels	291	6857752	Cofactors and Vitamins
ebi-a-GCST90026278	2021	Trigonelline (n'-methylnicotinate) levels	291	6874903	Cofactors and Vitamins
ebi-a-GCST90026296	2021	Ascorbic acid 3-sulfate levels	291	6872330	Cofactors and Vitamins
ebi-a-GCST90026162	2021	Gamma-glutamyl-alpha-lysine levels	291	6872439	Peptide
ebi-a-GCST90026163	2021	Gamma-glutamylglutamine levels	291	6859080	Peptide
ebi-a-GCST90026164	2021	Gamma-glutamylleucine levels	291	6869794	Peptide
ebi-a-GCST90026165	2021	Gamma-glutamylphenylalanine levels	291	6873803	Peptide
ebi-a-GCST90026166	2021	Gamma-glutamylthreonine levels	291	6864731	Peptide
ebi-a-GCST90026167	2021	Gamma-glutamylvaline levels	291	6867599	Peptide
ebi-a-GCST90026248	2021	Phenylacetylglutamine levels	291	6873547	Peptide
ebi-a-GCST90026068	2021	2,3-dihydroxyisovalerate levels	291	6868515	Xenobiotics
ebi-a-GCST90026070	2021	2-aminophenol sulfate levels	291	6864504	Xenobiotics
ebi-a-GCST90026076	2021	2-piperidinone levels	291	6872312	Xenobiotics
ebi-a-GCST90026084	2021	3-hydroxypyridine sulfate levels	291	6784323	Xenobiotics
ebi-a-GCST90026085	2021	3-hydroxystachydrine levels	291	6806628	Xenobiotics
ebi-a-GCST90026093	2021	3-methylxanthine levels	291	6863990	Xenobiotics
ebi-a-GCST90026097	2021	4-methylcatechol sulfate levels	291	6803305	Xenobiotics
ebi-a-GCST90026100	2021	5-acetylamino-6-amino-3-methyluracil levels	291	6862133	Xenobiotics
ebi-a-GCST90026109	2021	7-methylxanthine levels	291	6851916	Xenobiotics
ebi-a-GCST90026128	2021	Benzoate levels	291	6863954	Xenobiotics
ebi-a-GCST90026134	2021	Caffeine levels	291	6859792	Xenobiotics
ebi-a-GCST90026137	2021	Catechol sulfate levels	291	6870948	Xenobiotics
ebi-a-GCST90026150	2021	Diglycerol levels	291	6866837	Xenobiotics
ebi-a-GCST90026151	2021	Dimethyl sulfone levels	291	6868159	Xenobiotics
ebi-a-GCST90026155	2021	Ergothioneine levels	291	6869312	Xenobiotics
ebi-a-GCST90026156	2021	Erythritol levels	291	6864181	Xenobiotics
ebi-a-GCST90026168	2021	Gluconate levels	291	6859531	Xenobiotics
ebi-a-GCST90026175	2021	Guaiacol sulfate levels	291	6865700	Xenobiotics
ebi-a-GCST90026178	2021	Hippurate levels	291	6871959	Xenobiotics
ebi-a-GCST90026182	2021	Homostachydrine levels	291	6869151	Xenobiotics
ebi-a-GCST90026184	2021	Hydroxy-cmpf levels	291	6755868	Xenobiotics
ebi-a-GCST90026199	2021	Methyl glucopyranoside (alpha + beta) levels	291	6847022	Xenobiotics
ebi-a-GCST90026239	2021	O-sulfo-l-tyrosine levels	291	6864545	Xenobiotics
ebi-a-GCST90026041	2021	P-cresol sulfate levels	291	6874207	Xenobiotics
ebi-a-GCST90026257	2021	Quinate levels	291	6858167	Xenobiotics
ebi-a-GCST90026263	2021	Salicylate levels	291	6822080	Xenobiotics
ebi-a-GCST90026266	2021	Stachydrine levels	291	6876631	Xenobiotics
ebi-a-GCST90026268	2021	Succinimide levels	291	6847243	Xenobiotics
ebi-a-GCST90026009	2021	Sulfate levels	291	6849248	Xenobiotics
ebi-a-GCST90026270	2021	Tartarate levels	291	6867967	Xenobiotics
ebi-a-GCST90026271	2021	Tartronate (hydroxymalonate) levels	291	6867297	Xenobiotics
ebi-a-GCST90026272	2021	Theobromine levels	291	6874572	Xenobiotics
ebi-a-GCST90026272	2021	Theobromine levels	291	6874572	Xenobiotics
ebi-a-GCST90026274	2021	Thioproline levels	291	6693110	Xenobiotics
