# Supplementary material for: Elucidating the Causal Relationships between Cerebrospinal Fluid Metabolites and Glioblastoma Multiforme Insights from Mendelian Randomization Study
Source: Research Square preprint supplement (doi:10.21203/rs.3.rs-7534643/v1), 2025-11-24
Supplement: Supplementary file 3 [file cae49934e2943997cca55839.xlsx]

## Sheet: Sheet1
Table 2. MR Analysis Results with CSF Metabolites as Exposure Factors and GBM as Clinical Outcome.
id.exposure	exposure	outcome	method	nsnp	b	se	lo_ci	up_ci	or	or_lci95	or_uci95	pval
ebi-a-GCST90026086	3-methoxytyramine sulfate levels	Brain glioblastoma	MR Egger	3	-0.975077	1.77702	-4.45804	2.50788	0.377163	0.0115851	12.2789	0.680509
			Weighted median	3	-0.430774	0.793473	-1.98598	1.12443	0.650006	0.137246	3.07847	0.587201
			Inverse variance weighted	3	-0.382381	0.727397	-1.80808	1.04332	0.682235	0.163969	2.83862	0.599108
			Simple mode	3	-0.25917	1.03203	-2.28195	1.76361	0.771692	0.102085	5.83348	0.825162
			Weighted mode	3	-0.483231	0.744001	-1.94147	0.975011	0.616787	0.143492	2.6512	0.582644
ebi-a-GCST90026134	Caffeine levels	Brain glioblastoma	MR Egger	17	0.669712	0.396357	-0.107147	1.44657	1.95367	0.898394	4.24852	0.111762
			Weighted median	17	0.155126	0.197119	-0.231228	0.54148	1.16781	0.793559	1.71855	0.431302
			Inverse variance weighted	17	0.237016	0.14584	-0.0488307	0.522862	1.26746	0.952342	1.68685	0.104125
			Simple mode	17	0.164202	0.352566	-0.526827	0.85523	1.17845	0.590476	2.35192	0.647683
			Weighted mode	17	0.164202	0.338021	-0.49832	0.826723	1.17845	0.607551	2.28582	0.633713
ebi-a-GCST90026151	Dimethyl sulfone levels	Brain glioblastoma	MR Egger	4	-0.339117	1.27815	-2.84429	2.16606	0.712399	0.0581753	8.72385	0.815609
			Weighted median	4	-0.534602	0.420805	-1.35938	0.290176	0.585902	0.25682	1.33666	0.203932
			Inverse variance weighted	4	-0.419107	0.356043	-1.11695	0.278737	0.657634	0.327276	1.32146	0.239145
			Simple mode	4	-0.00934197	0.551986	-1.09123	1.07255	0.990702	0.335802	2.92282	0.98756
			Weighted mode	4	-0.596087	0.494388	-1.56509	0.372914	0.550963	0.20907	1.45196	0.314353
ebi-a-GCST90026159	Fructose levels	Brain glioblastoma	MR Egger	20	-2.28065	1.01724	-4.27444	-0.286868	0.102217	0.0139199	0.750611	0.0377968
			Weighted median	20	-0.828492	0.75828	-2.31472	0.657736	0.436707	0.0987938	1.93042	0.274572
			Inverse variance weighted	20	-1.3684	0.533959	-2.41496	-0.321838	0.254514	0.0893711	0.724815	0.010385
			Simple mode	20	-0.430869	1.53168	-3.43296	2.57123	0.649944	0.0322911	13.0819	0.781517
			Weighted mode	20	-0.0929666	1.4803	-2.99436	2.80843	0.911224	0.0500685	16.5839	0.95058
ebi-a-GCST90026247	Phenol sulfate levels	Brain glioblastoma	MR Egger	13	0.621938	0.620995	-0.595212	1.83909	1.86253	0.551446	6.2908	0.338098
			Weighted median	13	0.263609	0.403817	-0.527872	1.05509	1.30162	0.589859	2.87223	0.51389
			Inverse variance weighted	13	-0.00463693	0.324835	-0.641314	0.63204	0.995374	0.5266	1.88144	0.988611
			Simple mode	13	0.0164671	0.825781	-1.60206	1.635	1.0166	0.20148	5.12945	0.984418
			Weighted mode	13	0.350835	0.473908	-0.578025	1.2797	1.42025	0.561005	3.59554	0.473353
