# Supplementary material for: Elucidating the Causal Relationships between Cerebrospinal Fluid Metabolites and Glioblastoma Multiforme Insights from Mendelian Randomization Study
Source: Research Square preprint supplement (doi:10.21203/rs.3.rs-7534643/v1), 2025-11-24
Supplement: Supplementary file 4 [file f2ab939c86b2c595d86d9cf9.xlsx]

## Sheet: Sheet1
Supplementary Table 2. Plasm Metabolite information.
id	reportedTrait	discoverySampleAncestry
GCST90200437	Fructose levels	8137 European
GCST90200436	Caffeine levels	8005 European
GCST90199953	3-methoxytyramine sulfate levels	5419 European
GCST90199942	Dimethyl sulfone levels	7905 European
GCST90199773	Phenol sulfate levels	8249 European
